# Supplementary material for: Water-reservoir properties dependent on packing modes of [Ni(ii)3L6] cages
Source: Royal Society of Chemistry journal article supplement (doi:10.1039/d2nj04751a), 2022-01-01
Supplement: d2nj04751a1.pdf [file d2nj04751a1.pdf]

<Electronic Supplementary Information>

**Water-reservoir properties dependent on packing modes of [Ni(II)<sub>3</sub>L<sub>6</sub>] cages**

Geonwoo Gwak,<sup>a</sup> Seonghyeon An,<sup>a</sup> Dongwon Kim,<sup>a</sup> Martino Di Serio,<sup>b</sup> and Ok-Sang Jung<sup>\*a</sup>

<sup>a</sup>Department of Chemistry, Pusan National University, Busan 46241, Republic of Korea Fax: (+82) 51-5163522;

Tel: (+82) 51-5103240; E-mail: oksjung@pusan.ac.kr

<sup>b</sup>Department of Chemical Sciences, University of Naples Federico II, Naples, Italy

Electronic supplementary information (ESI) available: Experimental details and crystal-structure determination. IR spectra and full <sup>1</sup>H NMR spectra of each sample (L<sup>1</sup>, L<sup>2</sup>, L<sup>3</sup>, Br<sub>2</sub>@[Ni<sub>3</sub>L<sup>1</sup><sub>6</sub>(H<sub>2</sub>O)<sub>6</sub>]Br<sub>4</sub>·34H<sub>2</sub>O, Br<sub>2</sub>@[Ni<sub>3</sub>L<sup>2</sup><sub>6</sub>(H<sub>2</sub>O)<sub>6</sub>]Br<sub>4</sub>·38H<sub>2</sub>O, Br<sub>2</sub>@[Ni<sub>3</sub>L<sup>3</sup><sub>6</sub>(H<sub>2</sub>O)<sub>6</sub>]Br<sub>4</sub>·13H<sub>2</sub>O, and Cl<sub>2</sub>@[Ni<sub>3</sub>Cl<sub>3</sub>L<sup>3</sup><sub>6</sub>(H<sub>2</sub>O)<sub>3</sub>]Cl·5C<sub>4</sub>H<sub>8</sub>O<sub>2</sub>). TGA curves of Br<sub>2</sub>@[Ni<sub>3</sub>L<sup>1</sup><sub>6</sub>(H<sub>2</sub>O)<sub>6</sub>]Br<sub>4</sub>·34H<sub>2</sub>O, Br<sub>2</sub>@[Ni<sub>3</sub>L<sup>2</sup><sub>6</sub>(H<sub>2</sub>O)<sub>6</sub>]Br<sub>4</sub>·38H<sub>2</sub>O, and Br<sub>2</sub>@[Ni<sub>3</sub>L<sup>3</sup><sub>6</sub>(H<sub>2</sub>O)<sub>6</sub>]Br<sub>4</sub>·13H<sub>2</sub>O.

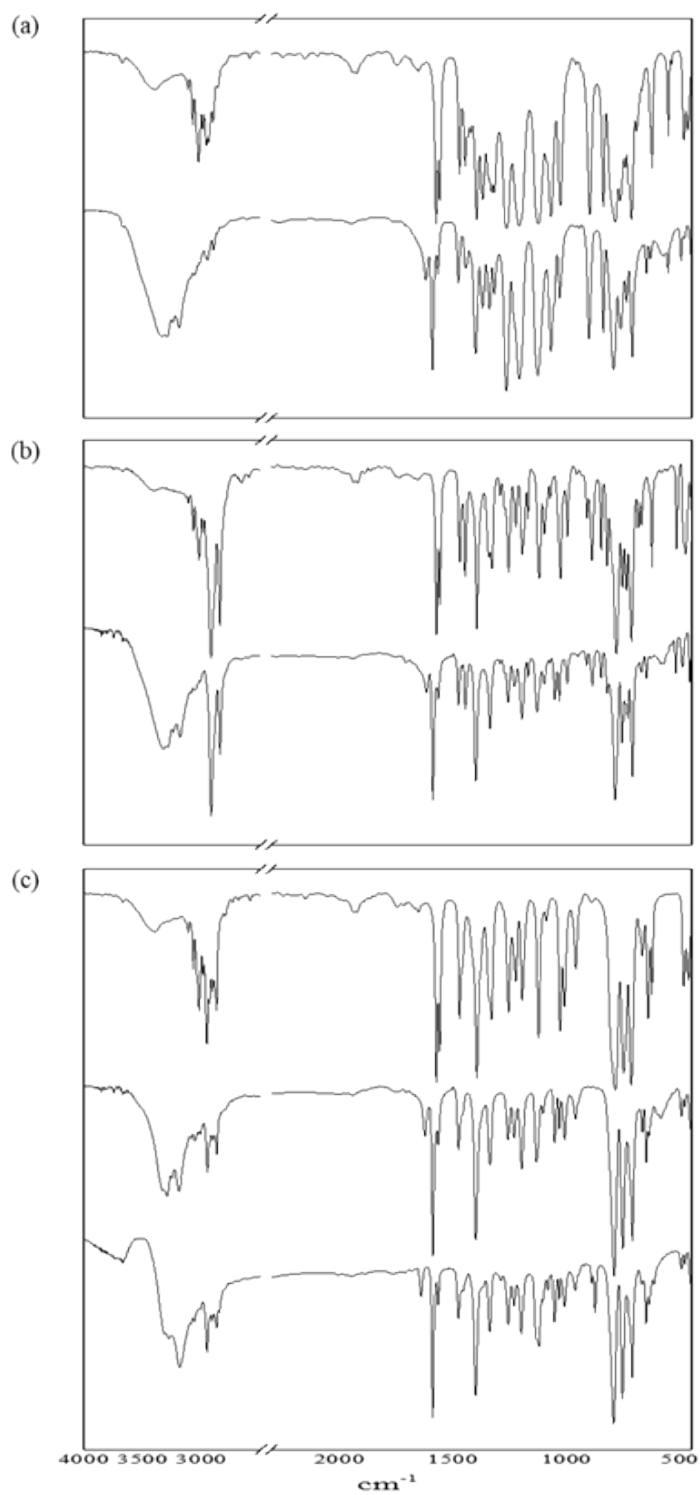

**Fig. S1** IR spectra of  $L^1$  and  $\text{Br}_2@[\text{Ni}_3L^1_6(\text{H}_2\text{O})_6]\text{Br}_4 \cdot 34\text{H}_2\text{O}$  (a),  $L^2$  and  $\text{Br}_2@[\text{Ni}_3L^2_6(\text{H}_2\text{O})_6]\text{Br}_4 \cdot 38\text{H}_2\text{O}$  (b), and  $L^3$ ,  $\text{Br}_2@[\text{Ni}_3L^3_6(\text{H}_2\text{O})_6]\text{Br}_4 \cdot 13\text{H}_2\text{O}$ , and  $\text{Cl}_2@[\text{Ni}_3\text{Cl}_3L^3_6(\text{H}_2\text{O})_3]\text{Cl} \cdot 5\text{C}_4\text{H}_8\text{O}_2$  (c).

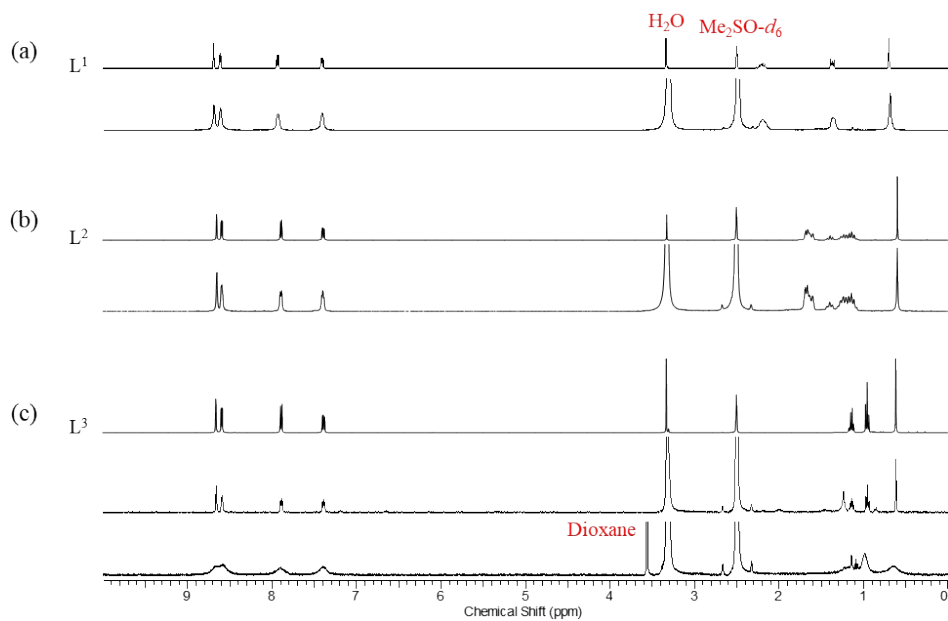

**Fig. S2**  $^1\text{H}$  NMR spectra of  $\text{L}^1$  and  $\text{Br}_2@[\text{Ni}_3\text{L}^1_6(\text{H}_2\text{O})_6]\text{Br}_4 \cdot 34\text{H}_2\text{O}$  (a),  $\text{L}^2$  and  $\text{Br}_2@[\text{Ni}_3\text{L}^2_6(\text{H}_2\text{O})_6]\text{Br}_4 \cdot 38\text{H}_2\text{O}$  (b), and  $\text{L}^3$ ,  $\text{Br}_2@[\text{Ni}_3\text{L}^3_6(\text{H}_2\text{O})_6]\text{Br}_4 \cdot 13\text{H}_2\text{O}$ , and  $\text{Cl}_2@[\text{Ni}_3\text{L}^3_6 \text{Cl}_3(\text{H}_2\text{O})_3]\text{Cl} \cdot 5\text{C}_4\text{H}_8\text{O}_2$  (c). The cage complexes were dissociated in  $\text{Me}_2\text{SO}$ .

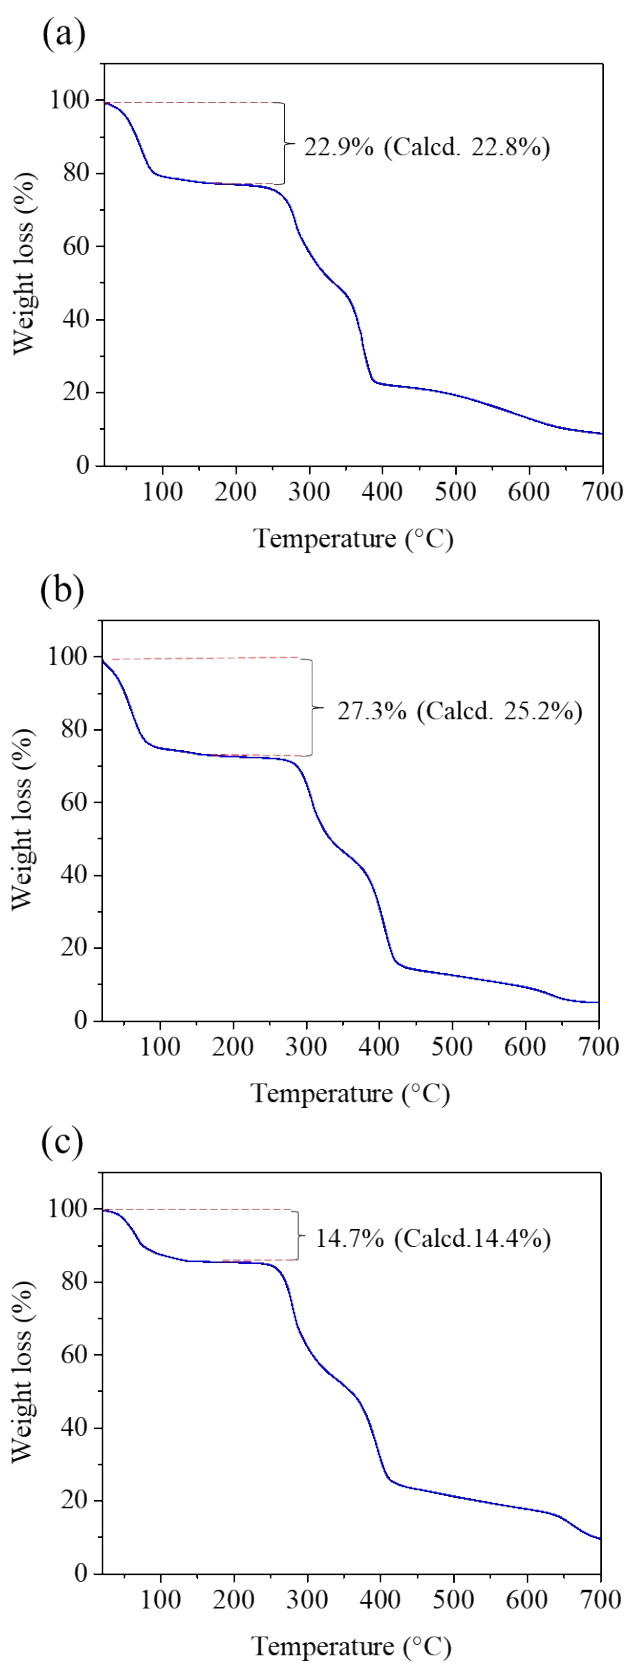

**Fig. S3** TGA results of original product for  $\text{Br}_2@[\text{Ni}_3\text{L}^1_6(\text{H}_2\text{O})_6]\text{Br}_4 \cdot 34\text{H}_2\text{O}$  (a),  $\text{Br}_2@[\text{Ni}_3\text{L}^2_6(\text{H}_2\text{O})_6]\text{Br}_4 \cdot 38\text{H}_2\text{O}$  (b), and  $\text{Br}_2@[\text{Ni}_3\text{L}^3_6(\text{H}_2\text{O})_6]\text{Br}_4 \cdot 13\text{H}_2\text{O}$  (c).

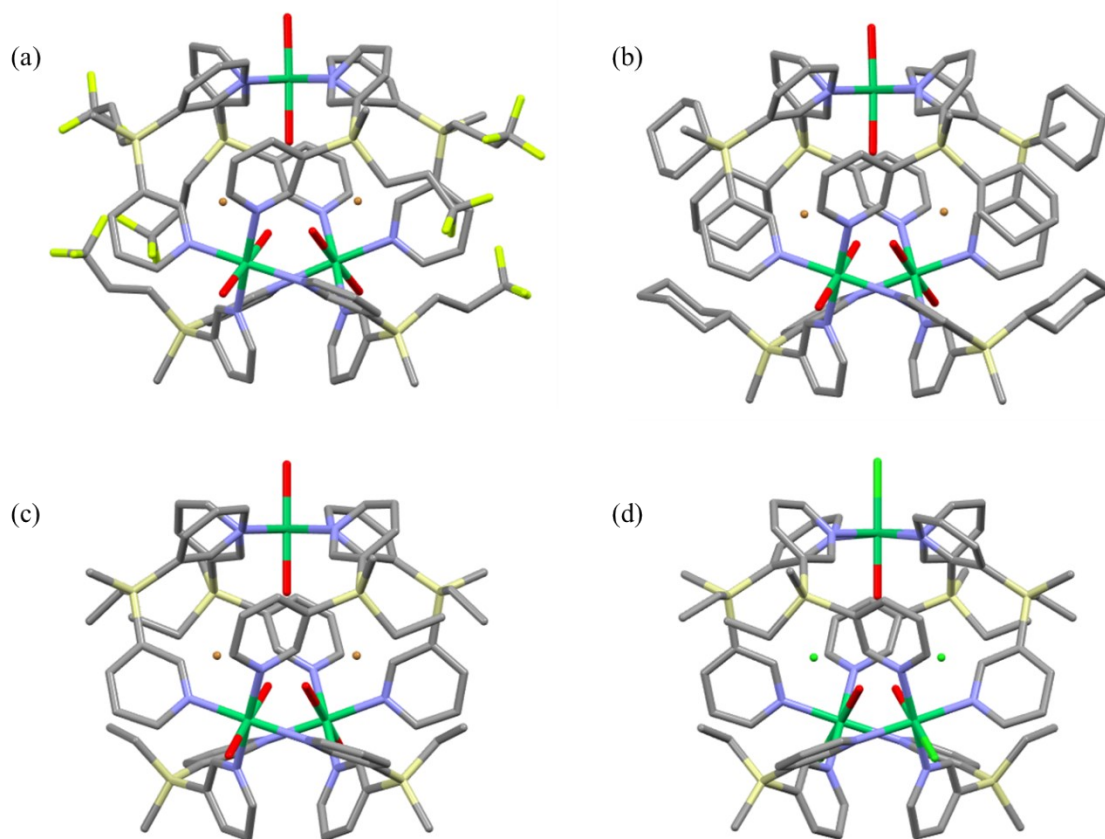

**Fig. S4** Molecular structures for  $\text{Br}_2@[\text{Ni}_3\text{L}^1_6(\text{H}_2\text{O})_6]\text{Br}_4 \cdot 34\text{H}_2\text{O}$  (a),  $\text{Br}_2@[\text{Ni}_3\text{L}^2_6(\text{H}_2\text{O})_6]\text{Br}_4 \cdot 38\text{H}_2\text{O}$  (b),  $\text{Br}_2@[\text{Ni}_3\text{L}^3_6(\text{H}_2\text{O})_6]\text{Br}_4 \cdot 13\text{H}_2\text{O}$  (c), and  $\text{Cl}_2@[\text{Ni}_3\text{L}^3_6\text{Cl}_3(\text{H}_2\text{O})_3]\text{Cl} \cdot 5\text{C}_4\text{H}_8\text{O}_2$  (d).

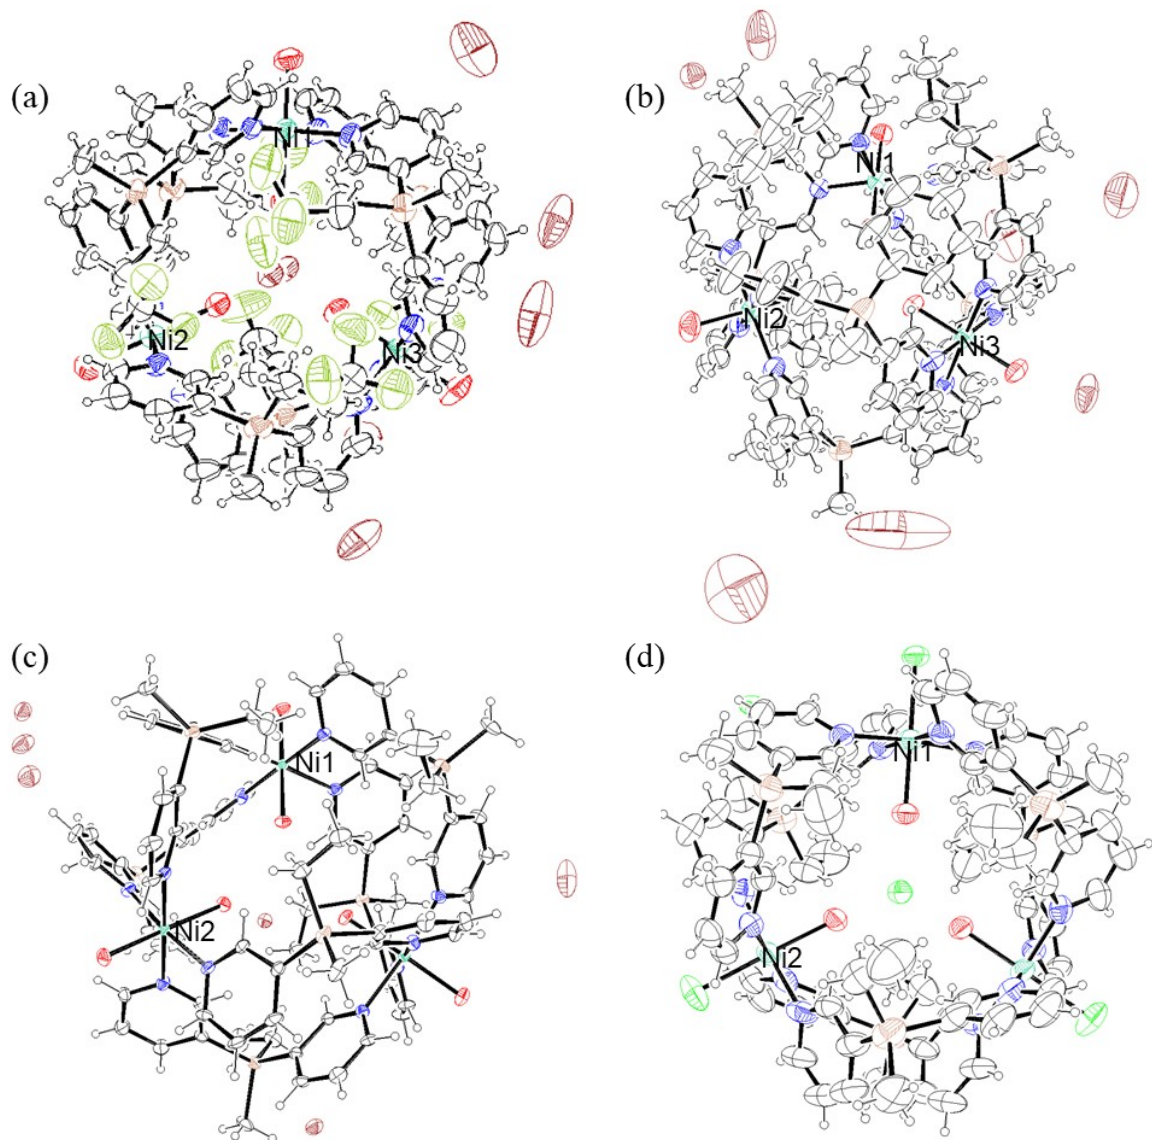

**Fig. S5** ORTEP structures of  $\text{Br}_2@[\text{Ni}_3\text{L}^1_6(\text{H}_2\text{O})_6]\text{Br}_4 \cdot 34\text{H}_2\text{O}$  (a),  $\text{Br}_2@[\text{Ni}_3\text{L}^2_6(\text{H}_2\text{O})_6]\text{Br}_4 \cdot 38\text{H}_2\text{O}$  (b),  $\text{Br}_2@[\text{Ni}_3\text{L}^3_6(\text{H}_2\text{O})_6]\text{Br}_4 \cdot 13\text{H}_2\text{O}$  (c), and  $\text{Cl}_2@[\text{Ni}_3\text{L}^3_6\text{Cl}_3(\text{H}_2\text{O})_3]\text{Cl} \cdot 5\text{C}_4\text{H}_8\text{O}_2$  (d) with thermal ellipsoids drawn at 30% probability

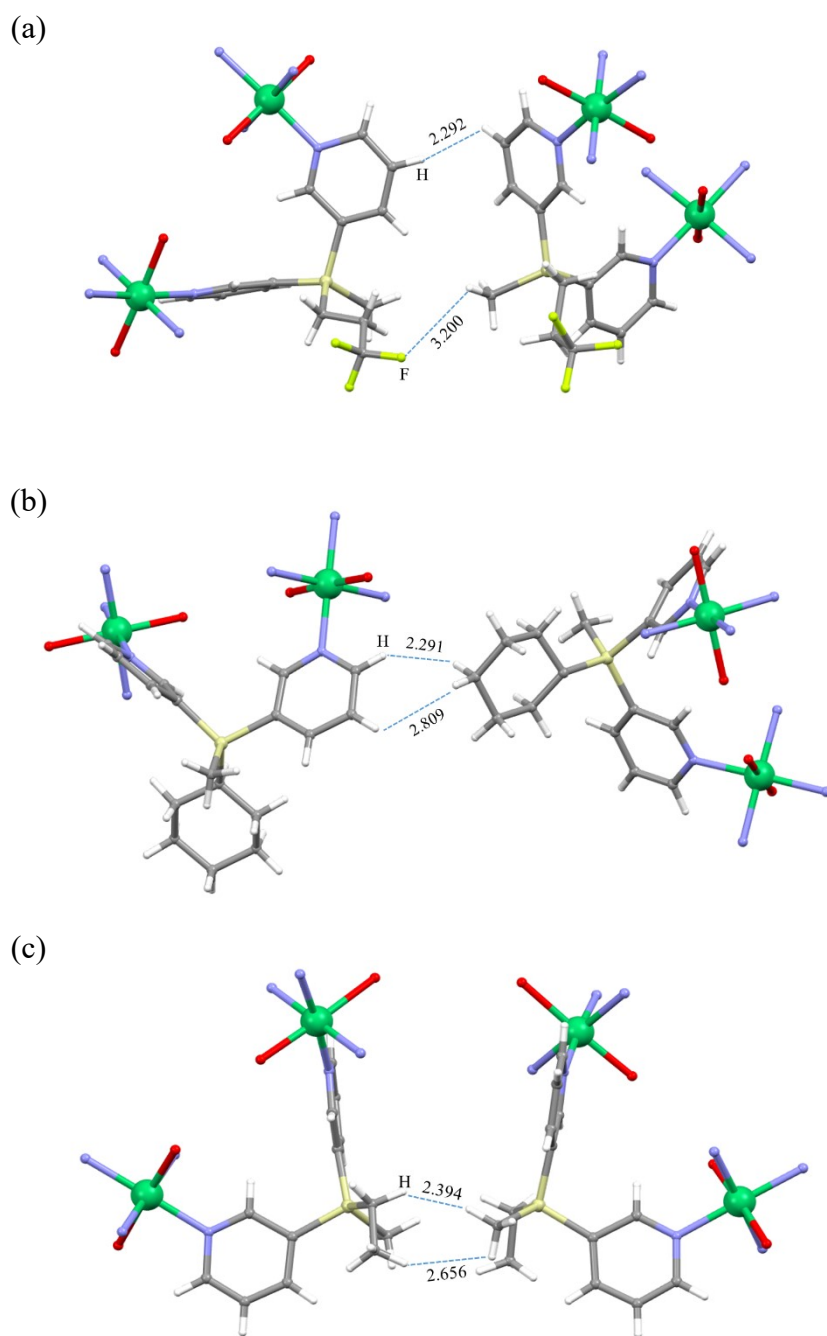

**Fig. S6** Shortest inter-cage CH  $\cdots$  HC or CF  $\cdots$  HC distance ( $\text{\AA}$ ) for  $\text{Br}_2@[\text{Ni}_3\text{L}^1_6(\text{H}_2\text{O})_6]\text{Br}_4 \cdot 34\text{H}_2\text{O}$  (a),  $\text{Br}_2@[\text{Ni}_3\text{L}^2_6(\text{H}_2\text{O})_6]\text{Br}_4 \cdot 38\text{H}_2\text{O}$  (b), and  $\text{Br}_2@[\text{Ni}_3\text{L}^3_6(\text{H}_2\text{O})_6]\text{Br}_4 \cdot 13\text{H}_2\text{O}$  (c).



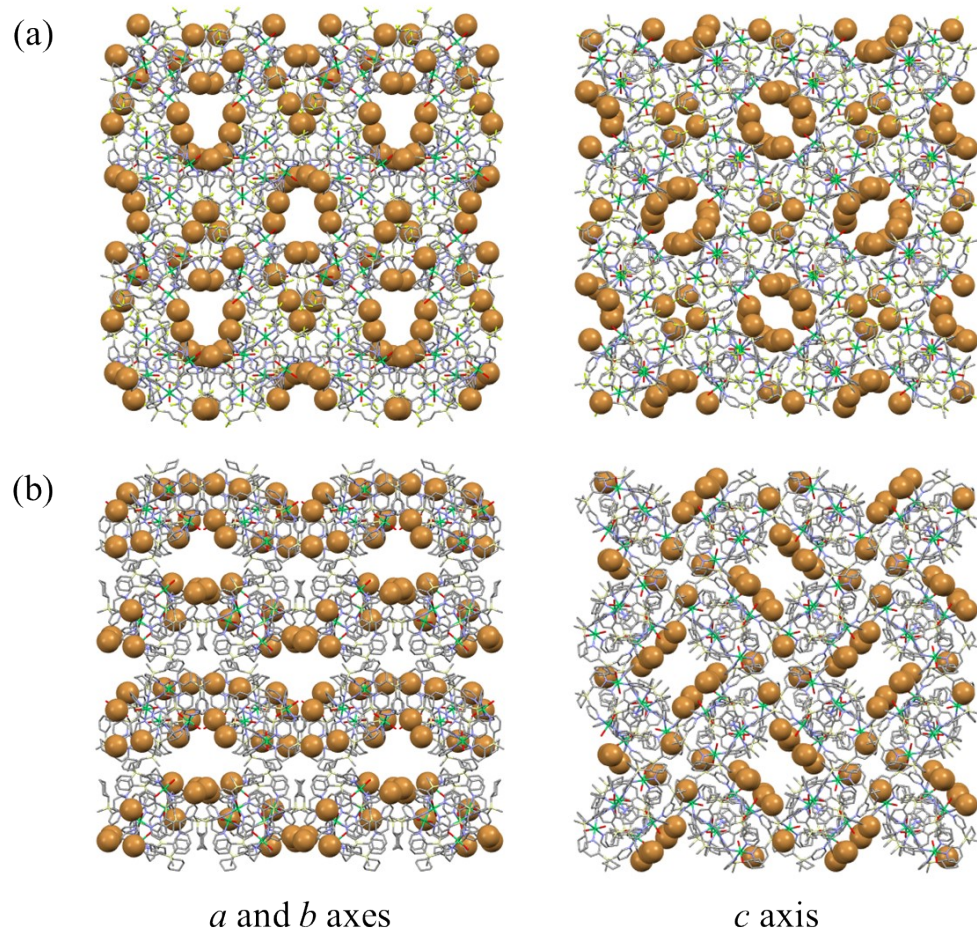

**Fig. S7** The crystal structures showing the position of outside Br<sup>-</sup> in Br<sub>2</sub>@[Ni<sub>3</sub>L<sup>1</sup><sub>6</sub>(H<sub>2</sub>O)<sub>6</sub>]Br<sub>4</sub>·34H<sub>2</sub>O (a) and Br<sub>2</sub>@[Ni<sub>3</sub>L<sup>2</sup><sub>6</sub>(H<sub>2</sub>O)<sub>6</sub>]Br<sub>4</sub>·38H<sub>2</sub>O (b).



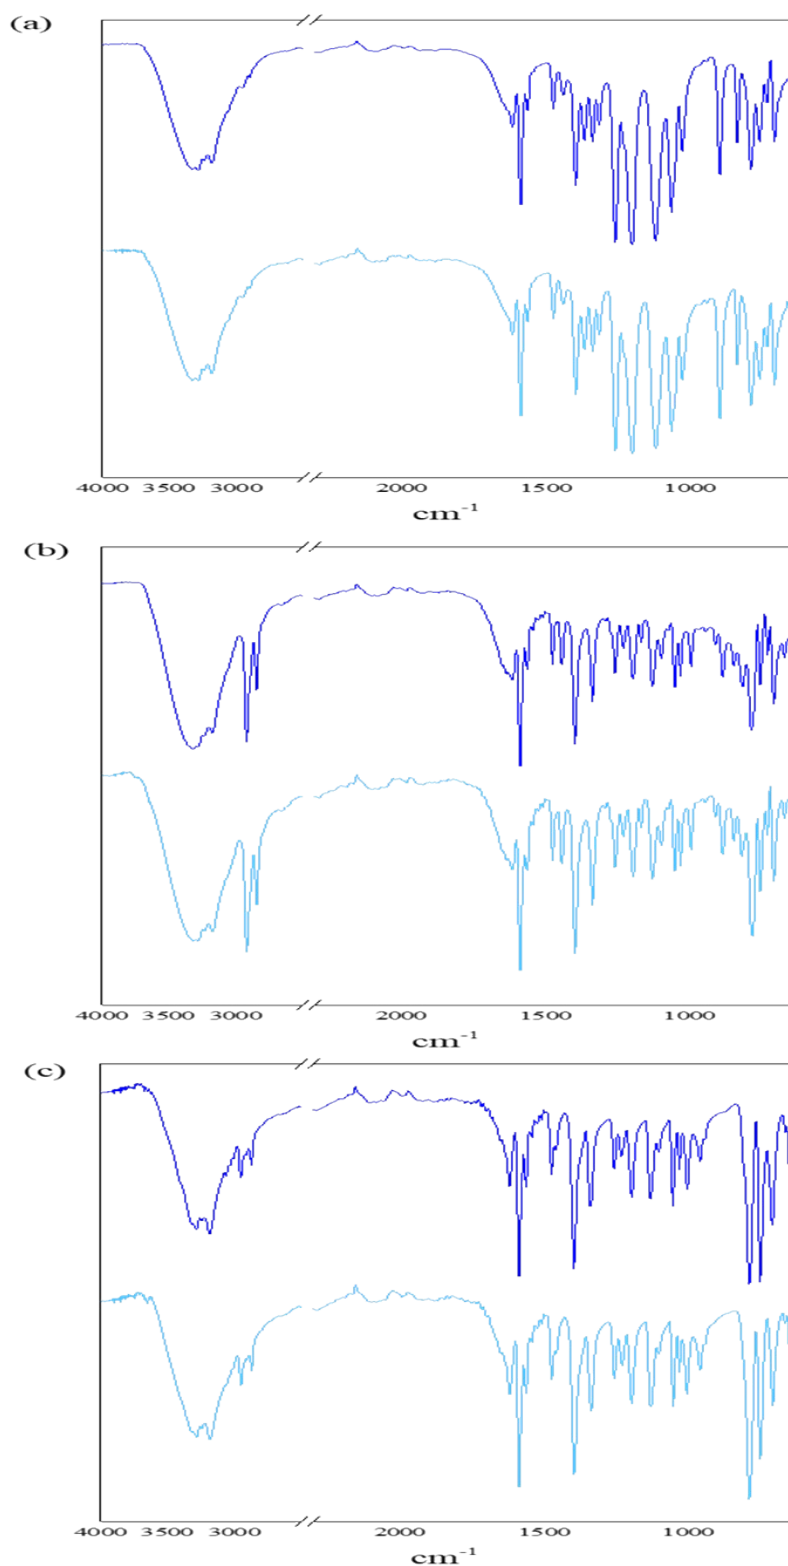

**Fig. S8** IR spectra of  $\text{Br}_2@[\text{Ni}_3\text{L}^1_6(\text{H}_2\text{O})_6]\text{Br}_4 \cdot 34\text{H}_2\text{O}$  (blue) and solvate  $\text{H}_2\text{O}$  reabsorbed  $\text{Br}_2@[\text{Ni}_3\text{L}^1_6(\text{H}_2\text{O})_6]\text{Br}_4 \cdot 34\text{H}_2\text{O}$  (light blue) (a),  $\text{Br}_2@[\text{Ni}_3\text{L}^2_6(\text{H}_2\text{O})_6]\text{Br}_4 \cdot 38\text{H}_2\text{O}$  (blue) and solvate  $\text{H}_2\text{O}$  reabsorbed  $\text{Br}_2@[\text{Ni}_3\text{L}^2_6(\text{H}_2\text{O})_6]\text{Br}_4 \cdot 38\text{H}_2\text{O}$  (light blue) (b),  $\text{Br}_2@[\text{Ni}_3\text{L}^3_6(\text{H}_2\text{O})_6]\text{Br}_4 \cdot 13\text{H}_2\text{O}$  (blue), and solvate  $\text{H}_2\text{O}$  reabsorbed  $\text{Br}_2@[\text{Ni}_3\text{L}^3_6(\text{H}_2\text{O})_6]\text{Br}_4 \cdot 13\text{H}_2\text{O}$  (light blue) (c).

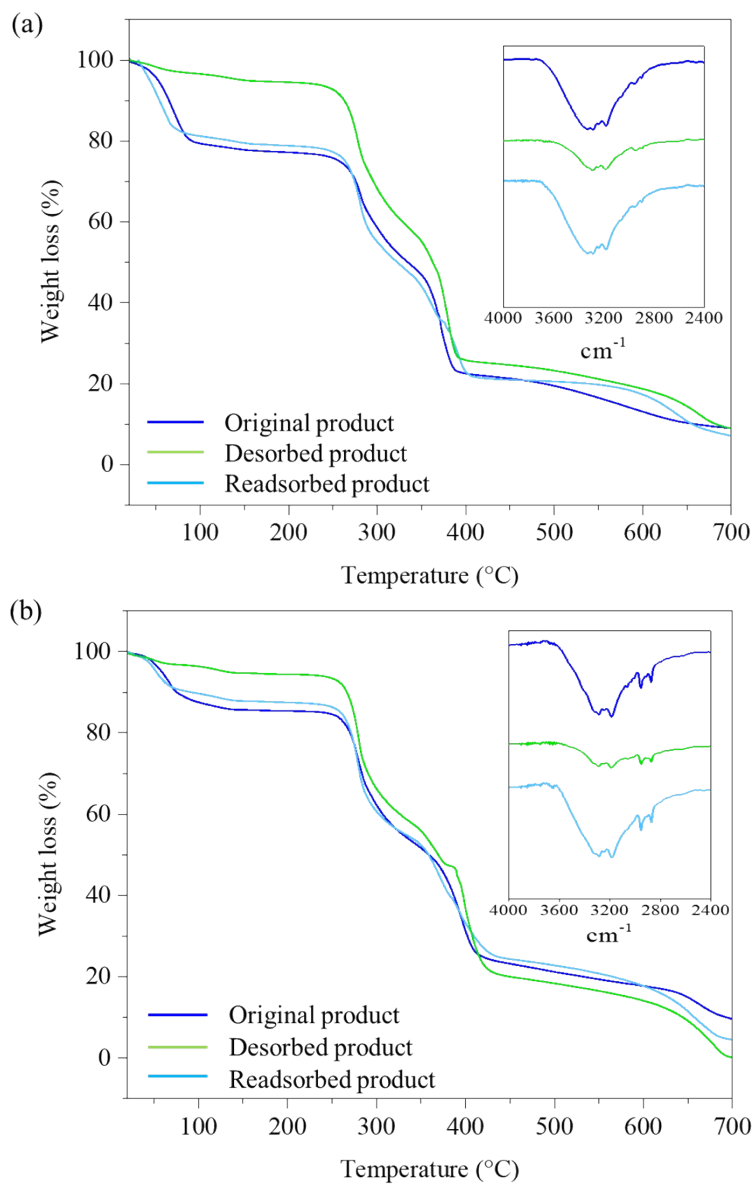

**Fig. S9** TGA and FT-IR spectra (inset) for  $\text{Br}_2@[\text{Ni}_3\text{L}^1_6(\text{H}_2\text{O})_6]\text{Br}_4 \cdot 34\text{H}_2\text{O}$  (a) and  $\text{Br}_2@[\text{Ni}_3\text{L}^3_6(\text{H}_2\text{O})_6]\text{Br}_4 \cdot 13\text{H}_2\text{O}$  (b). Original product (blue), after desorbed sample over  $\text{P}_2\text{O}_5$  (green), and after readsorbed sample in  $\text{H}_2\text{O}$  (light blue). The curve (green) shows that all of the  $\text{H}_2\text{O}$  molecules within the channels excepting the coordinated water molecules evaporated. The light blue curve indicates that the water solvates are restored in  $\text{H}_2\text{O}$ .

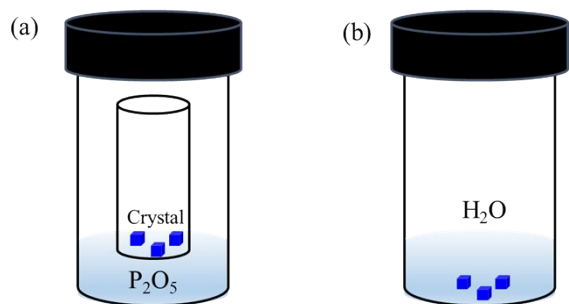

**Fig. S10** Procedure of solvate H<sub>2</sub>O desorption over P<sub>2</sub>O<sub>5</sub> (a) and readsorption in water (b). The procedure was monitored by TGA.

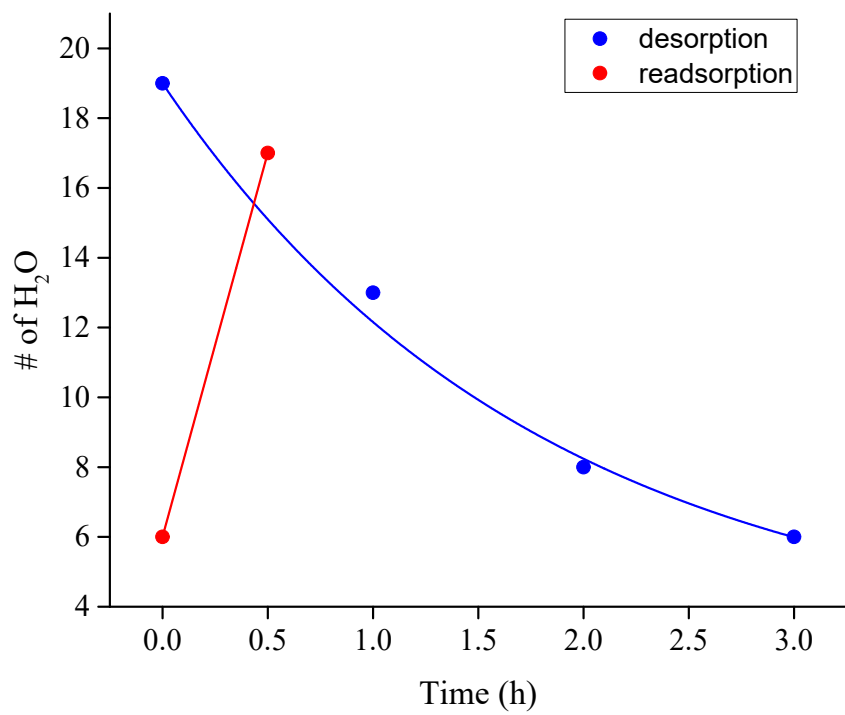

**Fig. S11** Water-desorption/readsorption rate of  $\text{Br}_2@[\text{Ni}_3\text{L}^3(\text{H}_2\text{O})_6]\text{Br}_4 \cdot 13\text{H}_2\text{O}$

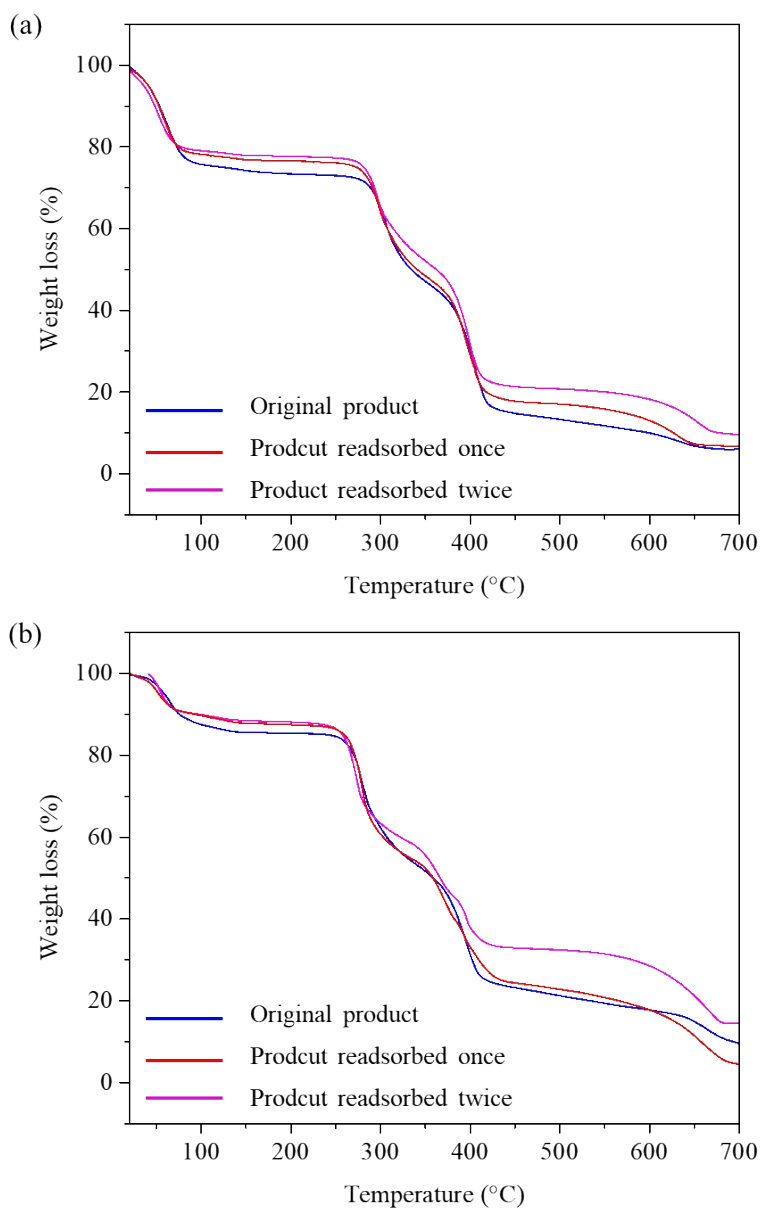

**Fig. S12** TGA results of recyclability test for  $\text{Br}_2@[\text{Ni}_3\text{L}^2_6(\text{H}_2\text{O})_6]\text{Br}_4 \cdot 38\text{H}_2\text{O}$  (a) and  $\text{Br}_2@[\text{Ni}_3\text{L}^3_6(\text{H}_2\text{O})_6]\text{Br}_4 \cdot 13\text{H}_2\text{O}$  (b).

**Table S1** Crystallographic data

|                                         | $\text{Br}_2@[\text{Ni}_3\text{L}^1_6(\text{H}_2\text{O})_6]\text{Br}_4 \cdot 34\text{H}_2\text{O}$   | $\text{Br}_2@[\text{Ni}_3\text{L}^2_6(\text{H}_2\text{O})_6]\text{Br}_4 \cdot 38\text{H}_2\text{O}$ | $\text{Br}_2@[\text{Ni}_3\text{L}^3_6(\text{H}_2\text{O})_6]\text{Br}_4 \cdot 13\text{H}_2\text{O}$ | $\text{Cl}_2@[\text{Ni}_3\text{L}^3_6\text{Cl}_3(\text{H}_2\text{O})_3]\text{Cl} \cdot 5\text{C}_4\text{H}_8\text{O}_2$ |
|-----------------------------------------|-------------------------------------------------------------------------------------------------------|-----------------------------------------------------------------------------------------------------|-----------------------------------------------------------------------------------------------------|-------------------------------------------------------------------------------------------------------------------------|
| Formula                                 | $\text{Ni}_3\text{Br}_6\text{C}_{84}\text{H}_{170}\text{O}_{40}\text{N}_{12}\text{F}_{18}\text{Si}_6$ | $\text{Ni}_3\text{Br}_6\text{C}_{102}\text{H}_{220}\text{O}_{44}\text{N}_{12}\text{Si}_6$           | $\text{Ni}_3\text{Br}_6\text{C}_{78}\text{H}_{134}\text{O}_{19}\text{N}_{12}\text{Si}_6$            | $\text{Ni}_3\text{Cl}_6\text{C}_{98}\text{H}_{141}\text{O}_{13}\text{N}_{12}\text{Si}_6$                                |
| $M_w$                                   | 3154.44                                                                                               | 3143.02                                                                                             | 2368.09                                                                                             | 2252.59                                                                                                                 |
| Cryst. sys.                             | Tetragonal                                                                                            | Tetragonal                                                                                          | Tetragonal                                                                                          | Monoclinic                                                                                                              |
| Space group                             | $P-42_1c$                                                                                             | $P-42_1c$                                                                                           | $I4_122$                                                                                            | $C2/c$                                                                                                                  |
| $a$ (Å)                                 | 30.232(4)                                                                                             | 31.291(4)                                                                                           | 23.0816(4)                                                                                          | 26.434(5)                                                                                                               |
| $b$ (Å)                                 | 30.232(4)                                                                                             | 31.291(4)                                                                                           | 23.0816(4)                                                                                          | 15.826(3)                                                                                                               |
| $c$ (Å)                                 | 30.935(6)                                                                                             | 31.796(6)                                                                                           | 39.4683(13)                                                                                         | 27.998(6)                                                                                                               |
| $\beta$ (°)                             | 90                                                                                                    | 90                                                                                                  | 90                                                                                                  | 105.26(3)                                                                                                               |
| $V$ (Å <sup>3</sup> )                   | 28273(10)                                                                                             | 31132(11)                                                                                           | 21027.1(10)                                                                                         | 11300(4)                                                                                                                |
| $Z$                                     | 8                                                                                                     | 8                                                                                                   | 8                                                                                                   | 4                                                                                                                       |
| $\rho$ (g cm <sup>-3</sup> )            | 1.482                                                                                                 | 1.341                                                                                               | 1.496                                                                                               | 1.324                                                                                                                   |
| $\mu$ (mm <sup>-1</sup> )               | 2.638                                                                                                 | 2.542                                                                                               | 2.945                                                                                               | 0.726                                                                                                                   |
| $R_{\text{int}}$                        | 0.0973                                                                                                | 0.0970                                                                                              | 0.0827                                                                                              | 0.1308                                                                                                                  |
| GoF on $F^2$                            | 0.941                                                                                                 | 0.989                                                                                               | 1.049                                                                                               | 0.903                                                                                                                   |
| $R_1$ [ $I > 2\sigma(I)$ ] <sup>a</sup> | 0.0663                                                                                                | 0.0579                                                                                              | 0.0436                                                                                              | 0.0844                                                                                                                  |
| $wR_2$ (all data) <sup>b</sup>          | 0.2096                                                                                                | 0.1850                                                                                              | 0.1234                                                                                              | 0.2776                                                                                                                  |

<sup>a</sup> $R_1 = \Sigma||F_o| - |F_c||/\Sigma|F_o|$ , <sup>b</sup> $wR_2 = (\Sigma[w(F_o^2 - F_c^2)^2]/\Sigma[w(F_o^2)^2])^{1/2}$

**Table S2** Bond lengths (Å) and angles (°)

| Br <sub>2</sub> @[Ni <sub>3</sub> L <sup>1</sup> <sub>6</sub> (H <sub>2</sub> O) <sub>6</sub> ]<br>Br <sub>4</sub> ·34H <sub>2</sub> O |          | Br <sub>2</sub> @[Ni <sub>3</sub> L <sup>2</sup> <sub>6</sub> (H <sub>2</sub> O) <sub>6</sub> ]<br>Br <sub>4</sub> ·38H <sub>2</sub> O |          | Br <sub>2</sub> @[Ni <sub>3</sub> L <sup>3</sup> <sub>6</sub> (H <sub>2</sub> O) <sub>6</sub> ]<br>Br <sub>4</sub> ·13H <sub>2</sub> O |          | Cl <sub>2</sub> @[Ni <sub>3</sub> L <sup>3</sup> <sub>6</sub> Cl <sub>3</sub> (H <sub>2</sub> O) <sub>3</sub> ]<br>Cl·5C <sub>4</sub> H <sub>8</sub> O <sub>2</sub> |          |
|----------------------------------------------------------------------------------------------------------------------------------------|----------|----------------------------------------------------------------------------------------------------------------------------------------|----------|----------------------------------------------------------------------------------------------------------------------------------------|----------|---------------------------------------------------------------------------------------------------------------------------------------------------------------------|----------|
| Ni(1)-O(6)                                                                                                                             | 2.065(9) | Ni(1)-O(4)                                                                                                                             | 2.098(6) | Ni(1)-O(4)                                                                                                                             | 2.079(5) | Ni(1)-N(5)                                                                                                                                                          | 2.115(5) |
| Ni(1)-N(3)                                                                                                                             | 2.085(9) | Ni(1)-O(3)                                                                                                                             | 2.098(7) | Ni(1)-O(3)                                                                                                                             | 2.087(5) | Ni(1)-N(5) <sup>#1</sup>                                                                                                                                            | 2.115(5) |
| Ni(1)-N(12)                                                                                                                            | 2.088(9) | Ni(1)-N(1E)                                                                                                                            | 2.104(7) | Ni(1)-N(1) <sup>#2</sup>                                                                                                               | 2.114(5) | Ni(1)-O(3)                                                                                                                                                          | 2.127(5) |
| Ni(1)-O(1)                                                                                                                             | 2.109(8) | Ni(1)-N(2D)                                                                                                                            | 2.109(7) | Ni(1)-N(1)                                                                                                                             | 2.114(5) | Ni(1)-N(4) <sup>#1</sup>                                                                                                                                            | 2.129(6) |
| Ni(1)-N(9)                                                                                                                             | 2.118(9) | Ni(1)-N(2B)                                                                                                                            | 2.116(7) | Ni(1)-N(3) <sup>#2</sup>                                                                                                               | 2.116(5) | Ni(1)-N(4)                                                                                                                                                          | 2.129(6) |
| Ni(1)-N(13)                                                                                                                            | 2.15(1)  | Ni(1)-N(1A)                                                                                                                            | 2.118(8) | Ni(1)-N(3)                                                                                                                             | 2.116(5) | Ni(1)-Cl(2)                                                                                                                                                         | 2.404(2) |
| Ni(2)-O(4)                                                                                                                             | 2.08(1)  | Ni(2)-O(5)                                                                                                                             | 2.072(6) | Ni(2)-N(4)                                                                                                                             | 2.092(4) | Ni(2)-N(6) <sup>#1</sup>                                                                                                                                            | 2.118(6) |
| Ni(2)-N(10)                                                                                                                            | 2.084(9) | Ni(2)-N(1D)                                                                                                                            | 2.090(9) | Ni(2)-N(6) <sup>#2</sup>                                                                                                               | 2.097(5) | Ni(2)-N(1)                                                                                                                                                          | 2.118(5) |
| Ni(2)-N(2)                                                                                                                             | 2.100(9) | Ni(2)-N(2F)                                                                                                                            | 2.105(5) | Ni(2)-O(1)                                                                                                                             | 2.102(4) | Ni(2)-N(2)                                                                                                                                                          | 2.123(6) |
| Ni(2)-N(4)                                                                                                                             | 2.111(9) | Ni(2)-N(2E)                                                                                                                            | 2.111(9) | Ni(2)-O(2)                                                                                                                             | 2.103(3) | Ni(2)-O(1)                                                                                                                                                          | 2.124(4) |
| Ni(2)-O(2)                                                                                                                             | 2.125(9) | Ni(2)-N(2C)                                                                                                                            | 2.115(8) | Ni(2)-N(2)                                                                                                                             | 2.103(4) | Ni(2)-N(3)                                                                                                                                                          | 2.146(6) |
| Ni(2)-O(4)                                                                                                                             | 2.08(1)  | Ni(2)-O(6)                                                                                                                             | 2.161(8) | Ni(2)-N(5)                                                                                                                             | 2.109(4) | Ni(2)-Cl(1)                                                                                                                                                         | 2.372(2) |
| Ni(3)-O(5)                                                                                                                             | 2.063(7) | Ni(3)-O(2)                                                                                                                             | 2.083(5) |                                                                                                                                        |          | N(5)-Ni(1)-N(5) <sup>#1</sup>                                                                                                                                       | 173.2(3) |
| Ni(3)-O(3)                                                                                                                             | 2.110(9) | Ni(3)-N(1F)                                                                                                                            | 2.083(9) | O(4)-Ni(1)-O(3)                                                                                                                        | 180.0    | N(5)-Ni(1)-O(3)                                                                                                                                                     | 86.6(1)  |
| Ni(3)-N(11)                                                                                                                            | 2.12(1)  | Ni(3)-O(1)                                                                                                                             | 2.109(6) | O(4)-Ni(1)-N(1) <sup>#2</sup>                                                                                                          | 90.7(1)  | N(5) <sup>#1</sup> -Ni(1)-O(3)                                                                                                                                      | 86.6(1)  |
| Ni(3)-N(7)                                                                                                                             | 2.123(1) | Ni(3)-N(1C)                                                                                                                            | 2.112(8) | O(3)-Ni(1)-N(1) <sup>#2</sup>                                                                                                          | 89.3(1)  | N(5)-Ni(1)-N(4) <sup>#1</sup>                                                                                                                                       | 88.6(2)  |
| Ni(3)-N(6)                                                                                                                             | 2.14(1)  | Ni(3)-N(1B)                                                                                                                            | 2.113(8) | O(4)-Ni(1)-N(1)                                                                                                                        | 90.7(1)  | N(5) <sup>#1</sup> -Ni(1)-N(4) <sup>#1</sup>                                                                                                                        | 91.4(2)  |
| Ni(3)-N(5)                                                                                                                             | 2.15(1)  | Ni(3)-N(2A)                                                                                                                            | 2.132(8) | O(3)-Ni(1)-N(1)                                                                                                                        | 89.3(1)  | O(3)-Ni(1)-N(4) <sup>#1</sup>                                                                                                                                       | 89.5(1)  |
| O(6)-Ni(1)-N(3)                                                                                                                        | 88.5(4)  | O(4)-Ni(1)-O(3)                                                                                                                        | 178.7(3) | N(1) <sup>#2</sup> -Ni(1)-N(1)                                                                                                         | 178.7(3) | N(5)-Ni(1)-N(4)                                                                                                                                                     | 91.4(2)  |
| O(6)-Ni(1)-N(12)                                                                                                                       | 91.7(4)  | O(4)-Ni(1)-N(1E)                                                                                                                       | 89.8(3)  | O(4)-Ni(1)-N(3) <sup>#2</sup>                                                                                                          | 91.7(1)  | N(5) <sup>#1</sup> -Ni(1)-N(4)                                                                                                                                      | 88.6(2)  |
| N(3)-Ni(1)-N(12)                                                                                                                       | 90.2(4)  | O(3)-Ni(1)-N(1E)                                                                                                                       | 89.1(3)  | O(3)-Ni(1)-N(3) <sup>#2</sup>                                                                                                          | 88.3(1)  | O(3)-Ni(1)-N(4)                                                                                                                                                     | 89.5(1)  |
| O(6)-Ni(1)-O(1)                                                                                                                        | 178.2(4) | O(4)-Ni(1)-N(2D)                                                                                                                       | 90.8(3)  | N(1) <sup>#2</sup> -Ni(1)-N(3) <sup>#2</sup>                                                                                           | 90.6(2)  | N(4) <sup>#1</sup> -Ni(1)-N(4)                                                                                                                                      | 178.9(3) |
| N(3)-Ni(1)-O(1)                                                                                                                        | 90.5(3)  | O(3)-Ni(1)-N(2D)                                                                                                                       | 90.0(3)  | N(1)-Ni(1)-N(3) <sup>#2</sup>                                                                                                          | 89.3(2)  | N(5)-Ni(1)-Cl(2)                                                                                                                                                    | 93.4(1)  |
| N(12)-Ni(1)-O(1)                                                                                                                       | 86.8(4)  | N(1E)-Ni(1)-N(2D)                                                                                                                      | 89.1(3)  | O(4)-Ni(1)-N(3)                                                                                                                        | 91.7(1)  | N(5) <sup>#1</sup> -Ni(1)-Cl(2)                                                                                                                                     | 93.4(1)  |
| O(6)-Ni(1)-N(9)                                                                                                                        | 91.3(4)  | O(4)-Ni(1)-N(2B)                                                                                                                       | 90.7(3)  | O(3)-Ni(1)-N(3)                                                                                                                        | 88.3(1)  | O(3)-Ni(1)-Cl(2)                                                                                                                                                    | 180.0    |
| N(3)-Ni(1)-N(9)                                                                                                                        | 178.4(4) | O(3)-Ni(1)-N(2B)                                                                                                                       | 90.3(3)  | N(1) <sup>#2</sup> -Ni(1)-N(3)                                                                                                         | 89.3(2)  | N(4) <sup>#1</sup> -Ni(1)-Cl(2)                                                                                                                                     | 90.5(1)  |
| N(12)-Ni(1)-N(9)                                                                                                                       | 91.4(4)  | N(1E)-Ni(1)-N(2B)                                                                                                                      | 179.2(3) | N(1)-Ni(1)-N(3)                                                                                                                        | 90.6(2)  | N(4)-Ni(1)-Cl(2)                                                                                                                                                    | 90.5(1)  |
| O(1)-Ni(1)-N(9)                                                                                                                        | 89.8(4)  | N(2D)-Ni(1)-N(2B)                                                                                                                      | 91.4(3)  | N(3) <sup>#2</sup> -Ni(1)-N(3)                                                                                                         | 176.7(2) | N(6) <sup>#1</sup> -Ni(2)-N(1)                                                                                                                                      | 88.4(2)  |
| O(6)-Ni(1)-N(13)                                                                                                                       | 92.9(4)  | O(4)-Ni(1)-N(1A)                                                                                                                       | 88.7(3)  | N(4)-Ni(2)-N(6) <sup>#2</sup>                                                                                                          | 178.7(2) | N(6) <sup>#1</sup> -Ni(2)-N(2)                                                                                                                                      | 173.7(2) |
| N(3)-Ni(1)-N(13)                                                                                                                       | 90.0(4)  | O(3)-Ni(1)-N(1A)                                                                                                                       | 90.6(3)  | N(4)-Ni(2)-O(1)                                                                                                                        | 89.5(2)  | N(1)-Ni(2)-N(2)                                                                                                                                                     | 90.6(2)  |
| N(12)-Ni(1)-N(13)                                                                                                                      | 175.5(4) | N(1E)-Ni(1)-N(1A)                                                                                                                      | 90.6(3)  | N(6) <sup>#2</sup> -Ni(2)-O(1)                                                                                                         | 89.5(2)  | N(6) <sup>#1</sup> -Ni(2)-O(1)                                                                                                                                      | 86.6(2)  |
| O(1)-Ni(1)-N(13)                                                                                                                       | 88.7(4)  | N(2D)-Ni(1)-N(1A)                                                                                                                      | 179.4(3) | N(4)-Ni(2)-O(2)                                                                                                                        | 89.8(2)  | N(1)-Ni(2)-O(1)                                                                                                                                                     | 89.9(1)  |
| N(9)-Ni(1)-N(13)                                                                                                                       | 88.5(4)  | N(2B)-Ni(1)-N(1A)                                                                                                                      | 88.8(3)  | N(6) <sup>#2</sup> -Ni(2)-O(2)                                                                                                         | 91.2(2)  | N(2)-Ni(2)-O(1)                                                                                                                                                     | 87.2(1)  |
| O(4)-Ni(2)-N(10)                                                                                                                       | 90.8(4)  | O(5)-Ni(2)-N(1D)                                                                                                                       | 90.9(3)  | O(1)-Ni(2)-O(2)                                                                                                                        | 177.9(2) | N(6) <sup>#1</sup> -Ni(2)-N(3)                                                                                                                                      | 92.5(2)  |
| O(4)-Ni(2)-N(2)                                                                                                                        | 90.8(4)  | O(5)-Ni(2)-N(2F)                                                                                                                       | 89.7(3)  | N(4)-Ni(2)-N(2)                                                                                                                        | 90.3(2)  | N(1)-Ni(2)-N(3)                                                                                                                                                     | 178.9(2) |
| N(10)-Ni(2)-N(2)                                                                                                                       | 177.8(5) | N(1D)-Ni(2)-N(2F)                                                                                                                      | 179.2(4) | N(6) <sup>#2</sup> -Ni(2)-N(2)                                                                                                         | 88.9(2)  | N(2)-Ni(2)-N(3)                                                                                                                                                     | 88.4(2)  |
| O(4)-Ni(2)-N(4)                                                                                                                        | 90.9(5)  | O(5)-Ni(2)-N(2E)                                                                                                                       | 89.4(3)  | O(1)-Ni(2)-N(2)                                                                                                                        | 94.2(2)  | O(1)-Ni(2)-N(3)                                                                                                                                                     | 89.6(1)  |
| N(10)-Ni(2)-N(4)                                                                                                                       | 90.7(4)  | N(1D)-Ni(2)-N(2E)                                                                                                                      | 91.1(3)  | O(2)-Ni(2)-N(2)                                                                                                                        | 87.8(2)  | N(6) <sup>#1</sup> -Ni(2)-Cl(1)                                                                                                                                     | 92.8(1)  |
| N(2)-Ni(2)-N(4)                                                                                                                        | 90.7(4)  | N(2F)-Ni(2)-N(2E)                                                                                                                      | 89.4(3)  | N(4)-Ni(2)-N(5)                                                                                                                        | 89.3(2)  | N(1)-Ni(2)-Cl(1)                                                                                                                                                    | 90.6(1)  |
| O(4)-Ni(2)-N(1)                                                                                                                        | 91.3(4)  | O(5)-Ni(2)-N(2C)                                                                                                                       | 88.9(3)  | N(6) <sup>#2</sup> -Ni(2)-N(5)                                                                                                         | 91.6(2)  | N(2)-Ni(2)-Cl(1)                                                                                                                                                    | 93.4(1)  |
| N(10)-Ni(2)-N(1)                                                                                                                       | 90.0(4)  | N(1D)-Ni(2)-N(2C)                                                                                                                      | 90.7(4)  | O(1)-Ni(2)-N(5)                                                                                                                        | 91.2(2)  | O(1)-Ni(2)-Cl(1)                                                                                                                                                    | 179.3(1) |
| N(2)-Ni(2)-N(1)                                                                                                                        | 88.5(4)  | N(2F)-Ni(2)-N(2C)                                                                                                                      | 88.8(3)  | O(2)-Ni(2)-N(5)                                                                                                                        | 86.8(2)  | N(3)-Ni(2)-Cl(1)                                                                                                                                                    | 89.9(1)  |
| N(4)-Ni(2)-N(1)                                                                                                                        | 177.7(5) | N(2E)-Ni(2)-N(2C)                                                                                                                      | 177.5(4) | N(2)-Ni(2)-N(5)                                                                                                                        | 174.6(2) |                                                                                                                                                                     |          |
| O(4)-Ni(2)-O(2)                                                                                                                        | 178.9(4) | O(5)-Ni(2)-O(6)                                                                                                                        | 178.0(3) |                                                                                                                                        |          |                                                                                                                                                                     |          |
| N(10)-Ni(2)-O(2)                                                                                                                       | 88.2(3)  | N(1D)-Ni(2)-O(6)                                                                                                                       | 88.3(4)  |                                                                                                                                        |          |                                                                                                                                                                     |          |
| N(2)-Ni(2)-O(2)                                                                                                                        | 90.1(4)  | N(2F)-Ni(2)-O(6)                                                                                                                       | 91.1(3)  |                                                                                                                                        |          |                                                                                                                                                                     |          |
| N(4)-Ni(2)-O(2)                                                                                                                        | 89.6(4)  | N(2E)-Ni(2)-O(6)                                                                                                                       | 88.7(4)  |                                                                                                                                        |          |                                                                                                                                                                     |          |
| N(1)-Ni(2)-O(2)                                                                                                                        | 88.2(4)  | N(2C)-Ni(2)-O(6)                                                                                                                       | 93.0(4)  |                                                                                                                                        |          |                                                                                                                                                                     |          |
| O(5)-Ni(3)-O(3)                                                                                                                        | 178.8(5) | O(2)-Ni(3)-N(1F)                                                                                                                       | 89.0(3)  |                                                                                                                                        |          |                                                                                                                                                                     |          |
| O(5)-Ni(3)-N(11)                                                                                                                       | 89.6(3)  | O(2)-Ni(3)-O(1)                                                                                                                        | 178.9(3) |                                                                                                                                        |          |                                                                                                                                                                     |          |
| O(3)-Ni(3)-N(11)                                                                                                                       | 89.8(5)  | N(1F)-Ni(3)-O(1)                                                                                                                       | 89.9(3)  |                                                                                                                                        |          |                                                                                                                                                                     |          |
| O(5)-Ni(3)-N(7)                                                                                                                        | 88.7(3)  | O(2)-Ni(3)-N(1C)                                                                                                                       | 90.8(3)  |                                                                                                                                        |          |                                                                                                                                                                     |          |
| O(3)-Ni(3)-N(7)                                                                                                                        | 91.9(5)  | N(1F)-Ni(3)-N(1C)                                                                                                                      | 89.9(3)  |                                                                                                                                        |          |                                                                                                                                                                     |          |
| N(11)-Ni(3)-N(7)                                                                                                                       | 176.7(4) | O(1)-Ni(3)-N(1C)                                                                                                                       | 89.6(3)  |                                                                                                                                        |          |                                                                                                                                                                     |          |
| O(5)-Ni(3)-N(6)                                                                                                                        | 89.9(4)  | O(2)-Ni(3)-N(1B)                                                                                                                       | 90.4(3)  |                                                                                                                                        |          |                                                                                                                                                                     |          |
| O(3)-Ni(3)-N(6)                                                                                                                        | 89.1(4)  | N(1F)-Ni(3)-N(1B)                                                                                                                      | 178.2(3) |                                                                                                                                        |          |                                                                                                                                                                     |          |
| N(11)-Ni(3)-N(6)                                                                                                                       | 91.6(4)  | O(1)-Ni(3)-N(1B)                                                                                                                       | 90.7(3)  |                                                                                                                                        |          |                                                                                                                                                                     |          |
| N(7)-Ni(3)-N(6)                                                                                                                        | 91.2(4)  | N(1C)-Ni(3)-N(1B)                                                                                                                      | 91.7(3)  |                                                                                                                                        |          |                                                                                                                                                                     |          |



|                  |          |                   |          |
|------------------|----------|-------------------|----------|
| O(5)-Ni(3)-N(5)  | 90.9(4)  | O(2)-Ni(3)-N(2A)  | 90.5(3)  |
| O(3)-Ni(3)-N(5)  | 90.1(5)  | N(1F)-Ni(3)-N(2A) | 90.5(3)  |
| N(11)-Ni(3)-N(5) | 90.0(4)  | O(1)-Ni(3)-N(2A)  | 89.1(3)  |
| N(7)-Ni(3)-N(5)  | 87.2(4)  | N(1C)-Ni(3)-N(2A) | 178.7(3) |
| N(6)-Ni(3)-N(5)  | 178.2(4) | N(1B)-Ni(3)-N(2A) | 87.9(3)  |

---

<sup>#1</sup> x, -y+3/2, -z+5/4  
<sup>#2</sup> -x+1, -y+1, z

<sup>#1</sup> -x+1, y, -z+3/2

---
